# Supplementary material for: Investigation and response to a scabies outbreak in a rural community in Biakoye District Ghana May 2025
Source: Research Square preprint supplement (doi:10.21203/rs.3.rs-7657946/v2), 2025-12-15
Supplement: Supplementary file 1 [file e28d6305d04f0c995a4d6c3a.docx]

**Table 2: Line List of Suspected and Confirmed Measles Cases in Abotoase, Biakoye District, March 2022**

| **Case ID** | **Age** | **Sex** | **Date of Onset** | **Household** | **Symptoms** | **Lab Confirmed** | **Treatment Given** |
| --- | --- | --- | --- | --- | --- | --- | --- |
| 01 | 8 | M | 01/05/2025 | HH1 | Itchy rash | Yes | Ivermectin |
| 02 | 35 | F | 05/05/2025 | HH1 | Rash, itching | No | Ivermectin |
| 03 | 14 | F | 05/05/2025 | HH1 | Rash | No | Ivermectin |
| 04 | 12 | M | 10/05/2025 | HH2 | Rash, itching | No | Ivermectin |
| 05 | 17 | F | 17/05/2025 | HH1 | Rash | No | Ivermectin |
| 06 | 40 | F | 18/05/2025 | HH2 | Rash | No | Ivermectin |
| 07 | 16 | M | 18/05/2025 | HH3 | Rash | No | Ivermectin |
| 08 | 10 | M | 25/05/2025 | HH3 | Rash | No | Ivermectin |
| 09 | 22 | F | 28/05/2025 | HH2 | Rash, itching | No | Ivermectin |
